# Supplementary material for: Primary immune responses are negatively impacted by persistent herpesvirus infections in older people: results from an observational study on healthy subjects and a vaccination trial on subjects aged more than 70 years old
Source: PubMed Central journal article supplement — eBioMedicine. 2022 Feb 1;76:103852. doi: 10.1016/j.ebiom.2022.103852 (PMC8818547; doi:10.1016/j.ebiom.2022.103852), 2022-02-01
Supplement: mmc1.pdf [file mmc1.pdf]

**Primary immune responses are impacted by persistent herpesvirus infections in older people: results from an observational study on healthy subjects and a vaccination trial on subjects aged more than 70 years old**

Nicoli et al.

**Supplemental figures**

**Figure S1**

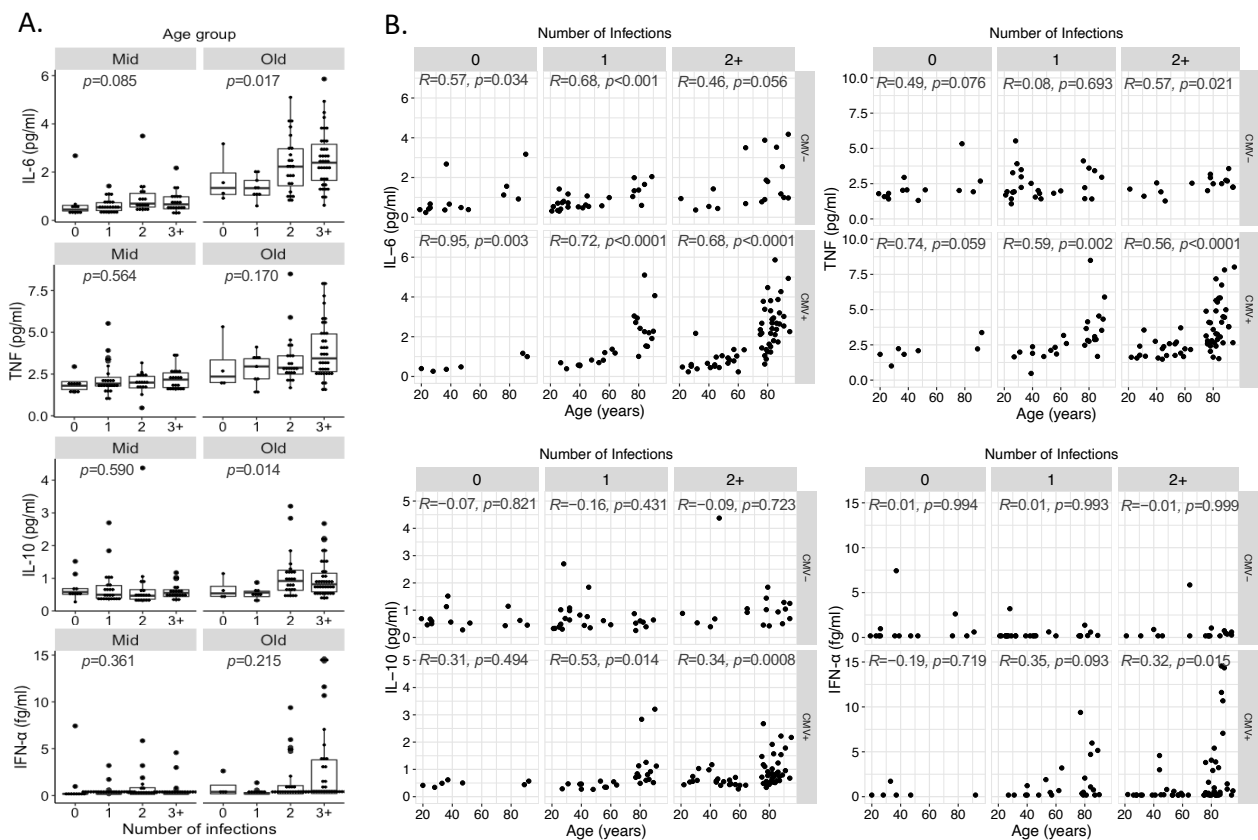

**Figure S1. Impact of age and herpesvirus infections on inflammation levels**

(A) Inflammatory cytokine levels according to the number of infections with herpesviruses in subjects grouped according to age and shown as box and whiskers plot (n=73 for Mid, n=76 for Old). (B) Correlation between inflammatory cytokine levels and age according to number of infections with herpesviruses (excluding CMV) and CMV seropositivity (n= 149). Spearman's R and p values are shown for each panel. Statistical significance was determined by Kruskal-Wallis test (A) or Spearman's rank correlation (B).

Figure S2

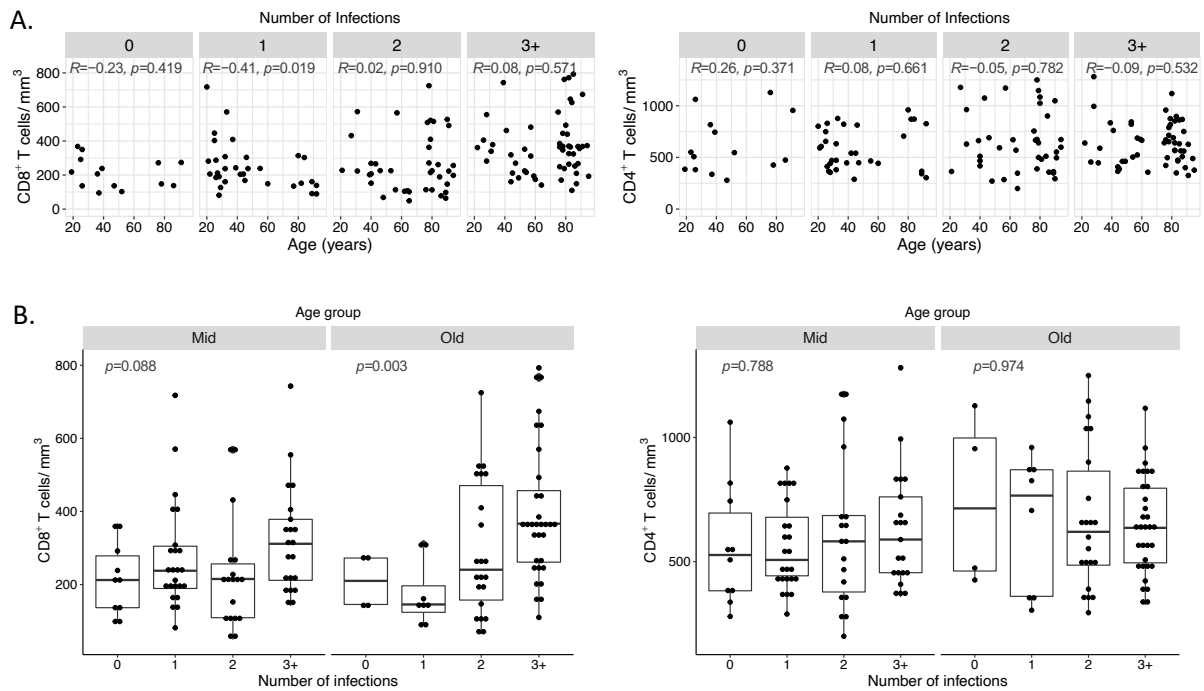

**Figure S2. Impact of age and herpesvirus infections on total CD8<sup>+</sup> and CD4<sup>+</sup> T cell counts**  
**(A)** Correlation between total CD8<sup>+</sup> and CD4<sup>+</sup> T cell absolute counts and age according to the number of infections with herpesviruses (n=13, 32, 39 and 49 for 0, 1, 2, and 3+ infections). Statistical significance was determined by Spearman's rank correlation. Spearman's R and p values are shown for each panel. **(B)** Absolute counts of total CD8<sup>+</sup> and CD4<sup>+</sup> T cells according to the number of infections with herpesviruses in subjects grouped according to age and shown as box and whiskers plot (n=73 for Mid, n=60 for Old). Statistical significance was determined by Kruskal-Wallis test.

Figure S3

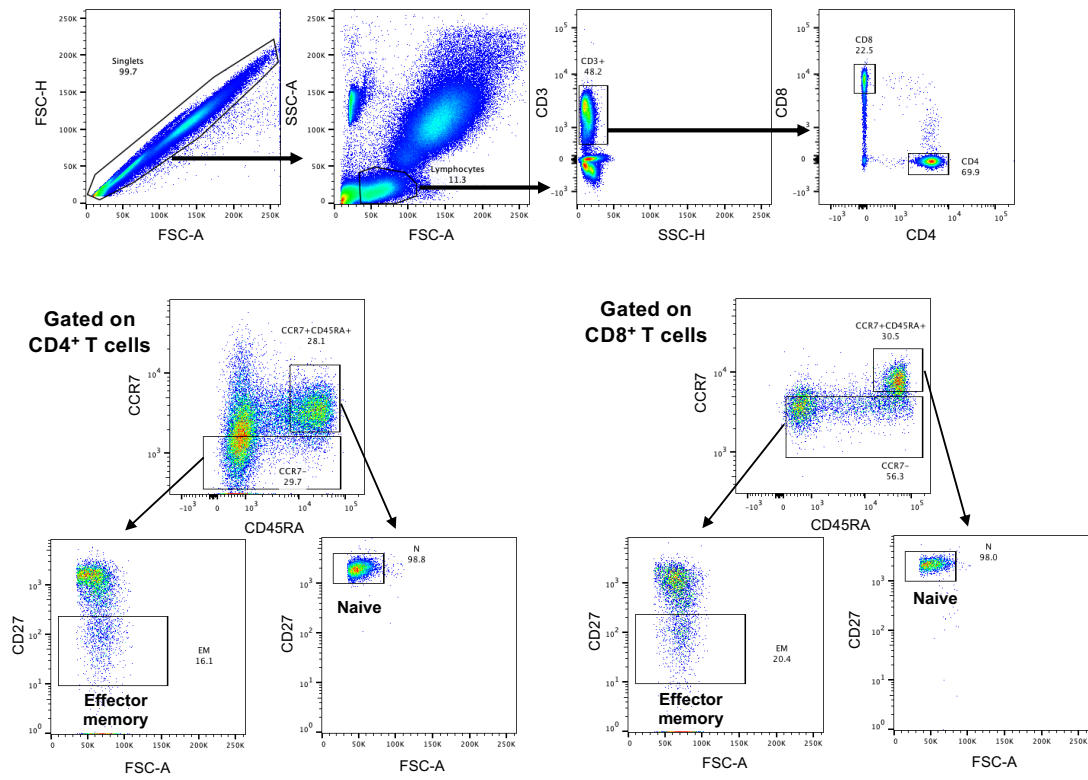

Figure S3. Gating strategy for the immunophenotyping for flow cytometry

Figure S4

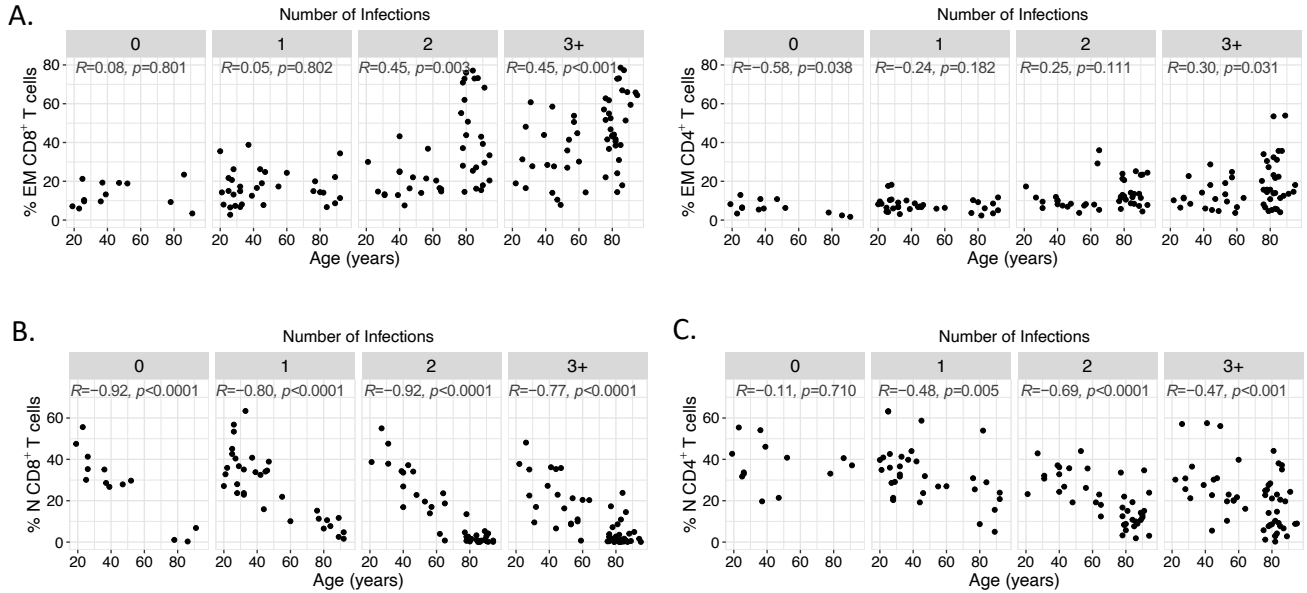

**Figure S4. Impact of age and herpesvirus infections on effector memory and naive T-cell percentages**

Correlation between effector memory CD8<sup>+</sup> and CD4<sup>+</sup> (A), and naive CD8<sup>+</sup> (B) and CD4<sup>+</sup> T-cell (C) percentages and age according to the number of infections with herpesviruses (n=13, 32, 39 and 49 for 0, 1, 2, and 3+ infections). Statistical significance was determined by Spearman's rank correlation. Spearman's R and p values are shown for each panel.

Figure S5

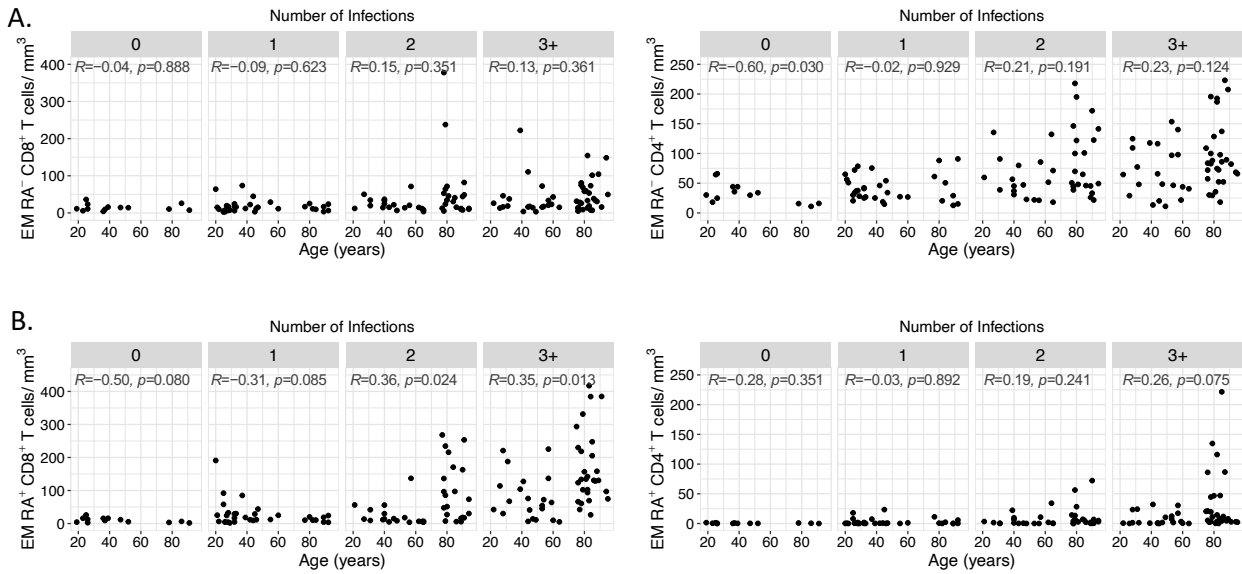

**Figure S5. Impact of age and herpesvirus infections on effector memory T-cell subsets**

Correlation between effector memory CD45RA<sup>-</sup> CD8<sup>+</sup> and CD4<sup>+</sup> (A), and effector memory CD45RA<sup>+</sup> CD8<sup>+</sup> and CD4<sup>+</sup> T-cell (B) absolute counts and age according to the number of infections with herpesviruses (n=13, 32, 39 and 49 for 0, 1, 2, and 3+ infections). Statistical significance was determined by Spearman's rank correlation. Spearman's R and p values are shown for each panel.

Figure S6

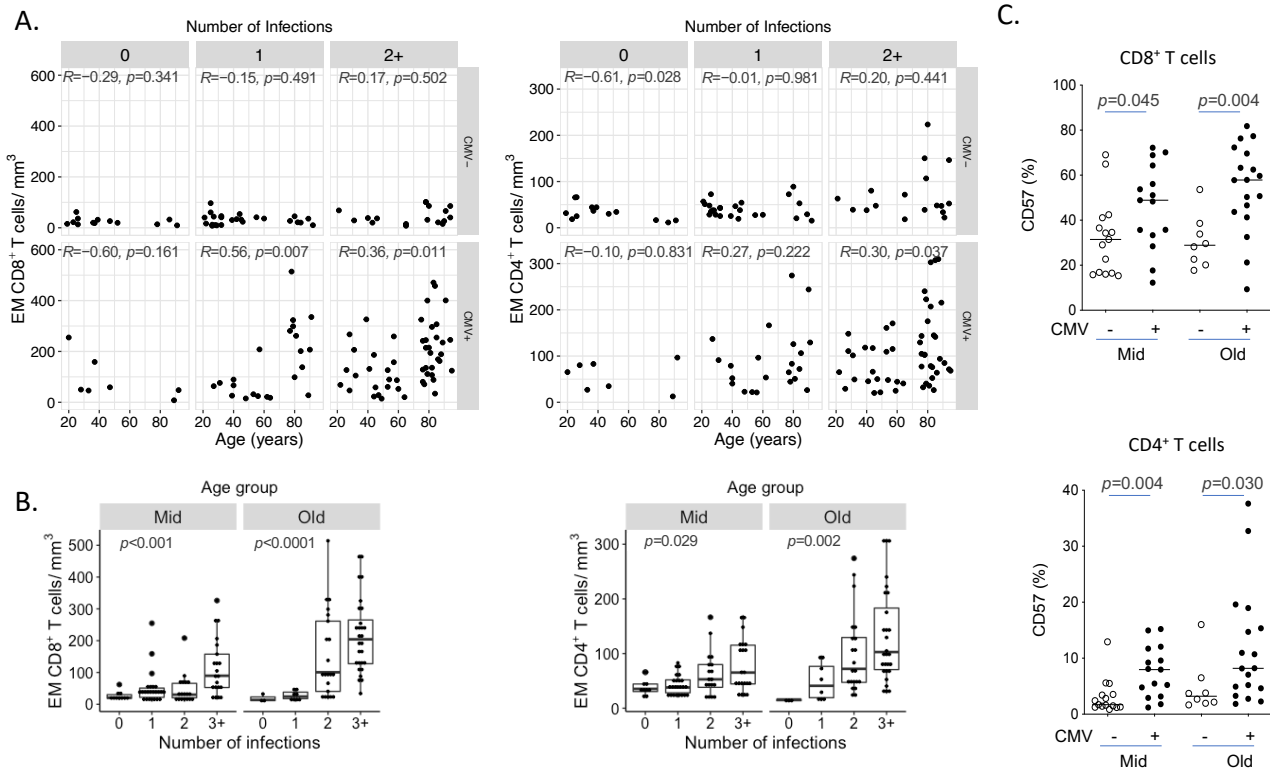

**Figure S6. Impact of age and herpesvirus infections on effector memory T-cell levels**

(A) Correlation between absolute counts of effector memory CD8<sup>+</sup> and CD4<sup>+</sup> T cells and age according to number of infections with herpesviruses (excluding CMV) and CMV seropositivity (n=133). (B) Absolute counts of effector memory CD8<sup>+</sup> and CD4<sup>+</sup> T cells according to the number of infections with herpesviruses in subjects grouped according to age and shown as box and whiskers plot (n=73 for Mid, n=60 for Old). (C) Percentages of CD57+ memory CD8<sup>+</sup> and CD4<sup>+</sup> T lymphocytes in different age groups (n=31 for Mid, n=26 for Old) according to CMV serostatus. Statistical significance was determined by Spearman's rank correlation (A), Kruskal-Wallis test (B) or Mann-Whitney test (C).

Figure S7

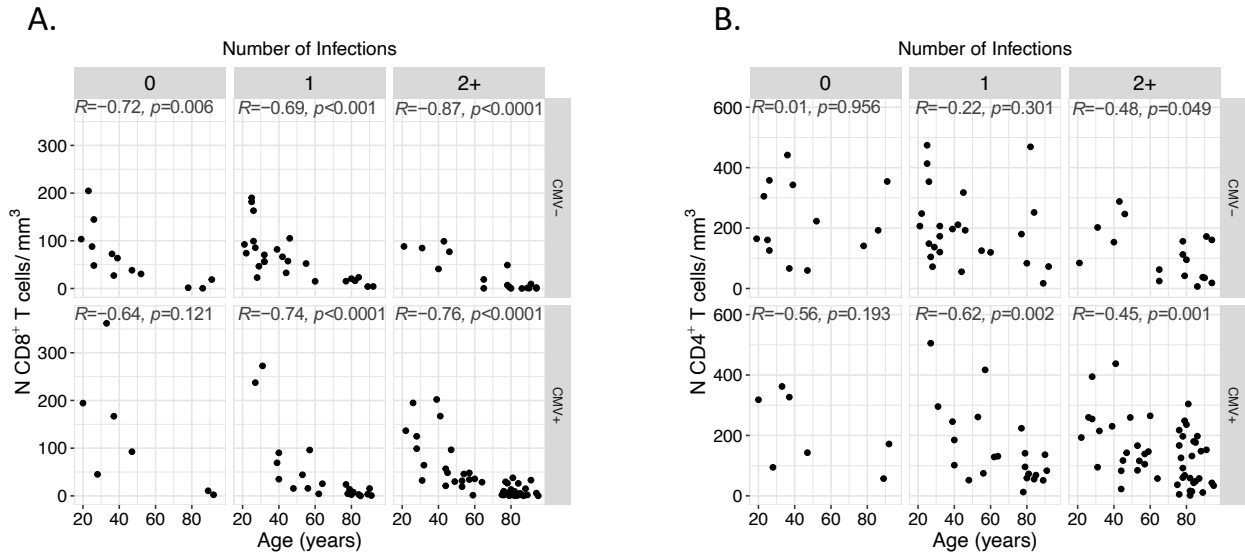

**Figure S7. Impact of age and herpesvirus infections on CD8<sup>+</sup> and CD4<sup>+</sup> naive T-cell levels**  
Correlation between absolute counts of naive CD8<sup>+</sup> (A) and CD4<sup>+</sup> (B) T cells and age according to number of infections with herpesviruses (excluding CMV) and CMV seropositivity (n=133). Statistical significance was determined by Spearman's rank correlation, Spearman's R and p values are shown for each panel.

Figure S8

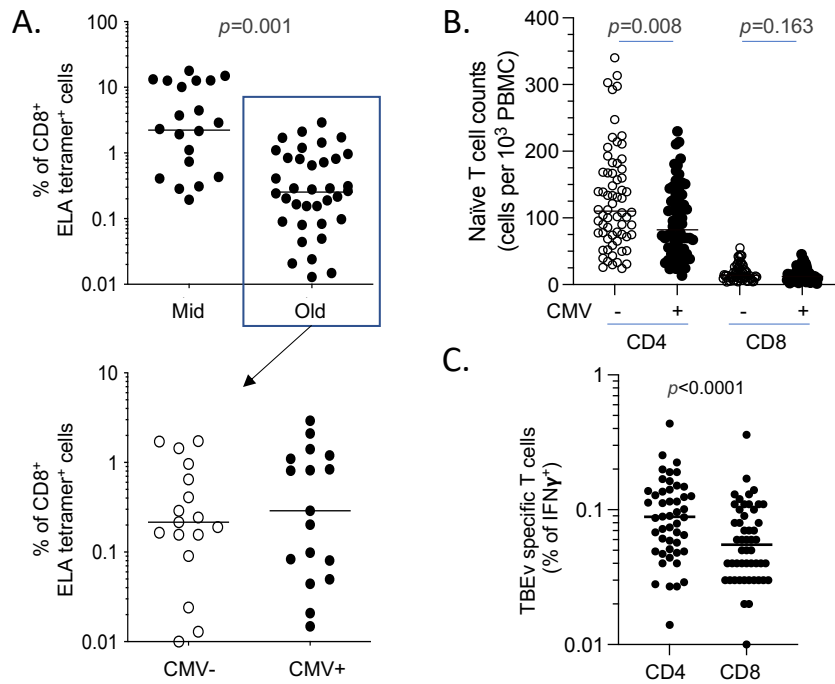

**Figure S8. Impact of CMV on CD8<sup>+</sup> T-cell priming efficacy in older subjects**

(A) Efficacy of antigen specific naive CD8<sup>+</sup> T-cell priming determined *in vitro* as frequency of tetramer<sup>+</sup>CD8<sup>+</sup> T cells at day 10 after stimulation with the ELA peptide in middle aged or older subjects (top panel) or older subjects grouped according to CMV seropositivity (bottom panel) (n=20 for Mid, n=34 for Old). (B) Absolute counts of naive CD4<sup>+</sup> or CD8<sup>+</sup> T cells according to the CMV serostatus of subjects (n=66 for CMV- and n=66 CMV+). (C) Frequency of TBEv-specific CD4<sup>+</sup> or CD8<sup>+</sup> T cells determined by intracellular IFN $\gamma$  staining upon stimulation with TBEv overlapping peptides at week 26 after vaccination in older subjects (>70y) (n=49). Statistical significance was determined by Mann-Whitney test. Each dot represents one donor and line median values.
